# Supplementary material for: Amine mediated proton transfer reaction and C–Cl bond activation of solvent chloroform by a trinuclear copper(ii) complex of a glucopyranosylamine derived ligand
Source: Royal Society of Chemistry journal article supplement (doi:10.1039/b606485j), 2006-01-01
Supplement: b606485j.pdf [file b606485j.pdf]

```
#=====
#-----
data trans-[CuCl2(dmen)2].H2O (compound 13c)
#-----
# CHEMICAL DATA
_chemical_formula_sum      'C8 H26 Cl2 Cu N4 O '
_chemical_formula_moiety   'C8 H26 Cl2 Cu N4 O '
_chemical_formula_weight   328.77
_chemical_melting_point    ?
#-----
# CRYSTAL DATA
_symmetry_cell_setting     monoclinic
_symmetry_space_group_name_H-M 'C 1 2 1'
_symmetry_Int_Tables_number 5
loop_
_symmetry_equiv_pos_as_xyz
x,y,z
-x,y,-z
1/2+x,1/2+y,z
```

```

1/2-x,1/2+y,-z
_cell_length_a      10.668(8)
_cell_length_b      8.306(6)
_cell_length_c      9.478(7)
_cell_angle_alpha   90
_cell_angle_beta    122.187(2)
_cell_angle_gamma   90
_cell_volume        710.7(9)
_cell_formula_units_Z  2
_cell_measurement_reflns_used  674
_cell_measurement_theta_min  4.7
_cell_measurement_theta_max  26.7
_cell_measurement_temperature  153.2
#-----
_exptl_crystal_description  'block'
_exptl_crystal_colour      'blue'
_exptl_crystal_size_max    0.350
_exptl_crystal_size_mid    0.300
_exptl_crystal_size_min    0.200
_exptl_crystal_size_rad    ?
_exptl_crystal_density_diffn  1.536
_exptl_crystal_density_meas  ?
_exptl_crystal_density_method  'not measured'
_exptl_absorpt_coefficient_mu  1.900
_exptl_absorpt_correction_type  multi-scan
_exptl_absorpt_process_details  'Jacobson, R. (1998) Private
communication'
_exptl_absorpt_correction_T_min  0.684
_exptl_absorpt_correction_T_max  1.000
#-----
# EXPERIMENTAL DATA
_diffrn_radiation_type      'Mo K\a'
_diffrn_radiation_wavelength  0.7107
_diffrn_measurement_device_type  'Rigaku/MSM Mercury CCD'
_diffrn_measurement_method    \w
_diffrn_detector_area_resol_mean  14.71
_diffrn_reflns_number        1587
_diffrn_reflns_av_R_equivalents  0.010
_diffrn_reflns_theta_min     3.00
_diffrn_reflns_theta_max     26.58
_diffrn_reflns_limit_h_min    0
_diffrn_reflns_limit_h_max    13
_diffrn_reflns_limit_k_min    0
_diffrn_reflns_limit_k_max    9
_diffrn_reflns_limit_l_min    -11
_diffrn_reflns_limit_l_max    9
#-----
# REFINEMENT DATA
_refine_special_details
;

```

Refinement using reflections with  $F^2 > 2.0 \sigma(F^2)$ . The weighted R-factor (wR) and goodness of fit (S) are based on  $F^2$ . R-factor (gt) are based on F. The threshold expression of  $F^2 > 2.0 \sigma(F^2)$  is used only for calculating R-factor (gt).

```

;
_reflns_number_total      592
_reflns_number_gt        558
_reflns_threshold_expression  >2.0sigma(I)
_refine_ls_structure_factor_coef  Fsqd
_refine_ls_R_factor_gt      0.0752
_refine_ls_wR_factor_ref    0.1484
_refine_ls_hydrogen_treatment  noref
_refine_ls_number_reflns    558
_refine_ls_number_parameters  75
_refine_ls_goodness_of_fit_ref  1.121
_refine_ls_weighting_scheme    calc
_refine_ls_weighting_details
'w = 1/[\s^2^(Fo^2) + (0.0445P)^2+6.1836P] where P=(Fo^2+2Fc^2)/3'
_refine_ls_shift/su_max      0.0351
_refine_ls_extinction_method  none
_refine_ls_extinction_coef    ?
_refine_ls_abs_structure_details
'Flack, H. D. (1983), Acta Cryst. A39, 876-881. 2580 Friedel Pairs'
_refine_ls_abs_structure_Flack  0.08(6)
_refine_diff_density_max      0.56
_refine_diff_density_min      -0.56
loop_
_atom_type_symbol
_atom_type_description
_atom_type_scatter_dispersion_real
_atom_type_scatter_dispersion_imag
_atom_type_scatter_source
'C' 'C' 0.003 0.002
;International Tables for Crystallography
(1992, Vol. C, Tables 4.2.6.8 and 6.1.1.4)
;
'H' 'H' 0.000 0.000
;International Tables for Crystallography
(1992, Vol. C, Table 6.1.1.4)
;
'Cl' 'Cl' 0.148 0.159
;International Tables for Crystallography
(1992, Vol. C, Tables 4.2.6.8 and 6.1.1.4)
;
'Cu' 'Cu' 0.320 1.265
;International Tables for Crystallography
(1992, Vol. C, Tables 4.2.6.8 and 6.1.1.4)
;
'N' 'N' 0.006 0.003
;International Tables for Crystallography

```

(1992, Vol. C, Tables 4.2.6.8 and 6.1.1.4)

;

'O' 'O' 0.011 0.006

;International Tables for Crystallography

(1992, Vol. C, Tables 4.2.6.8 and 6.1.1.4)

;

#-----

# ATOMIC COORDINATES AND DISPLACEMENT PARAMETERS

loop\_

\_atom\_site\_label

\_atom\_site\_type\_symbol

\_atom\_site\_fract\_x

\_atom\_site\_fract\_y

\_atom\_site\_fract\_z

\_atom\_site\_U\_iso\_or\_equiv

\_atom\_site\_adp\_type

\_atom\_site\_occupancy

\_atom\_site\_calc\_flag

\_atom\_site\_refinement\_flags

\_atom\_site\_disorder\_assembly

\_atom\_site\_disorder\_group

|       |    |           |           |           |           |      |      |            |
|-------|----|-----------|-----------|-----------|-----------|------|------|------------|
| Cu(1) | Cu | 0.5000    | 0.1894(2) | 1.0000    | 0.0227(6) | Uani | 1.00 | d S . .    |
| Cl(1) | Cl | 0.8113(2) | 0.1915(6) | 1.1168(2) | 0.0273(6) | Uani | 1.00 | d . . .    |
| O(1)  | O  | 1.0000    | 0.103(3)  | 1.5000    | 0.093(6)  | Uani | 1.00 | d S . .    |
| N(1)  | N  | 0.518(1)  | 0.028(2)  | 1.170(1)  | 0.029(3)  | Uani | 1.00 | d . . .    |
| N(2)  | N  | 0.525(1)  | 0.360(2)  | 1.172(1)  | 0.035(3)  | Uani | 1.00 | d . . .    |
| C(1)  | C  | 0.636(2)  | -0.106(3) | 1.226(3)  | 0.062(6)  | Uani | 1.00 | d . . .    |
| C(2)  | C  | 0.494(1)  | 0.122(2)  | 1.290(1)  | 0.040(3)  | Uani | 1.00 | d . . .    |
| C(3)  | C  | 0.580(1)  | 0.277(2)  | 1.329(1)  | 0.044(3)  | Uani | 1.00 | d . . .    |
| C(4)  | C  | 0.642(2)  | 0.462(2)  | 1.231(2)  | 0.048(5)  | Uani | 1.00 | d . . .    |
| H(1)  | H  | 0.3942    | 0.1451    | 1.2443    | 0.0507    | Uiso | 1.00 | calc . . . |
| H(2)  | H  | 0.5328    | 0.0633    | 1.3924    | 0.0507    | Uiso | 1.00 | calc . . . |
| H(3)  | H  | 0.6833    | 0.2539    | 1.3781    | 0.0540    | Uiso | 1.00 | calc . . . |
| H(4)  | H  | 0.5667    | 0.3411    | 1.4010    | 0.0540    | Uiso | 1.00 | calc . . . |
| H(5)  | H  | 0.6208    | -0.1847   | 1.2875    | 0.0861    | Uiso | 1.00 | calc . . . |
| H(6)  | H  | 0.6319    | -0.1509   | 1.1335    | 0.0861    | Uiso | 1.00 | calc . . . |
| H(7)  | H  | 0.7316    | -0.0570   | 1.2981    | 0.0861    | Uiso | 1.00 | calc . . . |
| H(8)  | H  | 0.7323    | 0.4093    | 1.2720    | 0.0614    | Uiso | 1.00 | calc . . . |
| H(9)  | H  | 0.6261    | 0.5351    | 1.1420    | 0.0614    | Uiso | 1.00 | calc . . . |
| H(10) | H  | 0.6481    | 0.5299    | 1.3174    | 0.0614    | Uiso | 1.00 | calc . . . |
| H(11) | H  | 0.4283    | -0.0340   | 1.1091    | 0.0385    | Uiso | 1.00 | calc . . . |
| H(12) | H  | 0.4343    | 0.4113    | 1.1371    | 0.0406    | Uiso | 1.00 | calc . . . |

loop\_

\_atom\_site\_aniso\_label

\_atom\_site\_aniso\_U\_11

\_atom\_site\_aniso\_U\_22

\_atom\_site\_aniso\_U\_33

\_atom\_site\_aniso\_U\_12

\_atom\_site\_aniso\_U\_13

\_atom\_site\_aniso\_U\_23  
Cu(1) 0.0331(8) 0.0223(9) 0.0159(7) 0.0000 0.0151(5) 0.0000  
Cl(1) 0.0197(9) 0.035(1) 0.0269(9) 0.000(2) 0.0120(7) 0.001(2)  
O(1) 0.12(1) 0.08(1) 0.034(6) 0.0000 0.014(7) 0.0000  
N(1) 0.037(7) 0.030(7) 0.022(6) 0.002(6) 0.017(6) 0.000(6)  
N(2) 0.037(7) 0.038(8) 0.025(6) 0.012(6) 0.014(5) -0.007(6)  
C(1) 0.031(8) 0.05(1) 0.09(1) 0.003(6) 0.019(8) 0.042(8)  
C(2) 0.047(6) 0.056(7) 0.027(5) -0.006(6) 0.025(4) 0.002(5)  
C(3) 0.040(6) 0.062(7) 0.033(5) -0.004(6) 0.021(4) -0.017(5)  
C(4) 0.037(8) 0.06(1) 0.045(8) 0.010(7) 0.017(7) -0.025(7)

#-----  
\_computing\_data\_collection 'CRYSTALCLEAR'  
\_computing\_cell\_refinement 'CRYSTALCLEAR'  
\_computing\_data\_reduction 'teXsan Ver. 1.11'  
\_computing\_structure\_solution SIR92  
\_computing\_structure\_refinement 'SHELXL93'  
\_computing\_publication\_material 'teXsan Ver. 1.11'  
\_computing\_molecular\_graphics 'ORTEP-II'

#-----  
\_geom\_special\_details  
;  
?  
;  
loop\_  
\_geom\_bond\_atom\_site\_label\_1  
\_geom\_bond\_atom\_site\_label\_2  
\_geom\_bond\_distance  
\_geom\_bond\_site\_symmetry\_1  
\_geom\_bond\_site\_symmetry\_2  
\_geom\_bond\_publ\_flag  
Cu(1) Cl(1) 2.887(3) .. yes  
Cu(1) Cl(1) 2.887(3) . 2\_657 yes  
Cu(1) N(1) 2.02(1) .. yes  
Cu(1) N(1) 2.02(1) . 2\_657 yes  
Cu(1) N(2) 2.06(1) .. yes  
Cu(1) N(2) 2.06(1) . 2\_657 yes  
N(1) C(1) 1.55(2) .. yes  
N(1) C(2) 1.51(2) .. yes  
N(2) C(3) 1.45(2) .. yes  
N(2) C(4) 1.35(2) .. yes  
C(2) C(3) 1.50(2) .. yes

#-----  
loop\_  
\_geom\_angle\_atom\_site\_label\_1  
\_geom\_angle\_atom\_site\_label\_2  
\_geom\_angle\_atom\_site\_label\_3  
\_geom\_angle  
\_geom\_angle\_site\_symmetry\_1  
\_geom\_angle\_site\_symmetry\_2  
\_geom\_angle\_site\_symmetry\_3

\_geom\_angle\_publ\_flag

Cl(1) Cu(1) Cl(1) 179.3(2) .. 2\_657 yes  
Cl(1) Cu(1) N(1) 95.6(4) ... yes  
Cl(1) Cu(1) N(1) 84.9(4) .. 2\_657 yes  
Cl(1) Cu(1) N(2) 93.0(4) ... yes  
Cl(1) Cu(1) N(2) 86.5(4) .. 2\_657 yes  
Cl(1) Cu(1) N(1) 84.9(4) 2\_657 .. yes  
Cl(1) Cu(1) N(1) 95.6(4) 2\_657 . 2\_657 yes  
Cl(1) Cu(1) N(2) 86.5(4) 2\_657 .. yes  
Cl(1) Cu(1) N(2) 93.0(4) 2\_657 . 2\_657 yes  
N(1) Cu(1) N(1) 96.9(8) .. 2\_657 yes  
N(1) Cu(1) N(2) 84.9(6) ... yes  
N(1) Cu(1) N(2) 177.3(6) .. 2\_657 yes  
N(1) Cu(1) N(2) 177.3(6) 2\_657 .. yes  
N(1) Cu(1) N(2) 84.9(6) 2\_657 . 2\_657 yes  
N(2) Cu(1) N(2) 93.2(8) .. 2\_657 yes  
Cu(1) N(1) C(1) 117(1) ... yes  
Cu(1) N(1) C(2) 105.7(9) ... yes  
C(1) N(1) C(2) 123(1) ... yes  
Cu(1) N(2) C(3) 107.1(10) ... yes  
Cu(1) N(2) C(4) 117(1) ... yes  
C(3) N(2) C(4) 95(1) ... yes  
N(1) C(2) C(3) 107(1) ... yes  
N(2) C(3) C(2) 107.1(9) ... yes  
N(1) Cu(1) N(1) 96.9(8) .. 2\_657 yes  
N(1) Cu(1) N(2) 84.9(6) ... yes  
N(1) Cu(1) N(2) 177.3(6) .. 2\_657 yes  
N(1) Cu(1) Cl(1) 95.6(4) ... yes  
N(1) Cu(1) Cl(1) 84.9(4) .. 2\_657 yes  
N(1) Cu(1) N(2) 177.3(6) 2\_657 .. yes  
N(1) Cu(1) N(2) 84.9(6) 2\_657 . 2\_657 yes  
N(1) Cu(1) Cl(1) 84.9(4) 2\_657 .. yes  
N(1) Cu(1) Cl(1) 95.6(4) 2\_657 . 2\_657 yes  
N(2) Cu(1) N(2) 93.2(8) .. 2\_657 yes  
N(2) Cu(1) Cl(1) 93.0(4) ... yes  
N(2) Cu(1) Cl(1) 86.5(4) .. 2\_657 yes  
N(2) Cu(1) Cl(1) 86.5(4) 2\_657 .. yes  
N(2) Cu(1) Cl(1) 93.0(4) 2\_657 . 2\_657 yes  
Cl(1) Cu(1) Cl(1) 179.3(2) .. 2\_657 yes

#-----

#===END of compound 13c

#-----

#=====

=====

#===CIF END

#=====

=====
